# Supplementary material for: Removal of mango-flavoured Juul pods created opportunity for adulterated mango Juul-compatible pods with altered chemical constituents
Source: PubMed Central journal article supplement — Tob Control. 2022 Oct 28;31(Suppl 3):s230–3. doi: 10.1136/tc-2022-057476 (PMC9664127; doi:10.1136/tc-2022-057476), 2022-10-28
Supplement: tc-2022-057476supp001.pdf [file tc-2022-057476supp001.pdf]

| Brand                       | Flavor         | Listed Nicotine (mg/ml) | Average Detected Nicotine Concentration (mg/ml) | Listed vs Detected Nicotine (mg/ml) | Acetoin (mg/ml) | Butanoic Acid (mg/ml) | Benzaldehyde (mg/ml) | 2,3,5-Trimethylpyrazine (mg/ml) | DL-Limonene (mg/ml) | Eucalyptol (mg/ml) | Benzyl Alcohol (mg/ml) | Furaneol (mg/ml) | Maltol (mg/ml) | L-Menthol (mg/ml) | Methyl Salicylate (mg/ml) | Ethyl Maltol (mg/ml) | (+)-Pulegone (mg/ml) | Ethyl Salicylate (mg/ml) | trans-Cinnamaldehyde (mg/ml) | Triacetin (mg/ml) | Eugenol (mg/ml) | Vanillin (mg/ml) | Ethyl Vanillin (mg/ml) | Isovanillin (mg/ml) | Total Flavoring (mg/ml) |
|-----------------------------|----------------|-------------------------|-------------------------------------------------|-------------------------------------|-----------------|-----------------------|----------------------|---------------------------------|---------------------|--------------------|------------------------|------------------|----------------|-------------------|---------------------------|----------------------|----------------------|--------------------------|------------------------------|-------------------|-----------------|------------------|------------------------|---------------------|-------------------------|
| Juul                        | Mango          | 50.0                    | <b>57.2±0.9</b>                                 | <b>7.2 (14.4%)</b>                  | BLOQ            | BLOQ                  | BLOQ                 | BLOQ                            | BLOQ                | BLOQ               | <b>0.02±0.00</b>       | BLOQ             | BLOQ           | BLOQ              | BLOQ                      | <b>1.1±0.1</b>       | BLOQ                 | BLOQ                     | BLOQ                         | BLOQ              | BLOQ            | BLOQ             | BLOQ                   | BLOQ                | 1.1                     |
| Sk7                         | Mango          | 60.0                    | <b>56.5±1.1</b>                                 | <b>-3.5 (5.7%)</b>                  | BLOQ            | BLOQ                  | BLOQ                 | BLOQ                            | BLOQ                | BLOQ               | <b>0.2±0.01</b>        | BLOQ             | BLOQ           | BLOQ              | BLOQ                      | <b>0.9±0.2</b>       | BLOQ                 | BLOQ                     | BLOQ                         | <b>0.3±0.1</b>    | BLOQ            | BLOQ             | BLOQ                   | BLOQ                | 1.4                     |
| Puff                        | Mango          | 50.0                    | <b>55.4±1.3</b>                                 | <b>5.4 (10.8%)</b>                  | BLOQ            | BLOQ                  | BLOQ                 | BLOQ                            | BLOQ                | BLOQ               | <b>0.3±0.01</b>        | BLOQ             | BLOQ           | BLOQ              | BLOQ                      | <b>0.9±0.2</b>       | BLOQ                 | BLOQ                     | BLOQ                         | <b>0.8±0.2</b>    | BLOQ            | BLOQ             | BLOQ                   | BLOQ                | 1.1                     |
| Skoi                        | Mango          | 50.0                    | <b>54.0±1.4</b>                                 | <b>4.0 (8.0%)</b>                   | BLOQ            | BLOQ                  | BLOQ                 | BLOQ                            | BLOQ                | BLOQ               | <b>0.2±0.01</b>        | BLOQ             | BLOQ           | BLOQ              | <b>0.7±0.1</b>            | <b>1.8±0.2</b>       | BLOQ                 | BLOQ                     | BLOQ                         | <b>1.9±0.4</b>    | BLOQ            | BLOQ             | BLOQ                   | BLOQ                | 4.6                     |
| Fruyt                       | Mango          | 62.0                    | <b>53.2±2.2</b>                                 | <b>-8.8 (14.2%)</b>                 | BLOQ            | BLOQ                  | BLOQ                 | BLOQ                            | BLOQ                | BLOQ               | <b>0.5±0.1</b>         | BLOQ             | BLOQ           | BLOQ              | <b>1.9±0.5</b>            | BLOQ                 | BLOQ                 | BLOQ                     | BLOQ                         | <b>4.8±1.1</b>    | BLOQ            | BLOQ             | BLOQ                   | BLOQ                | 7.1                     |
| JFit                        | Mango          | 50.0                    | <b>51.7±1.0</b>                                 | <b>1.7 (3.4%)</b>                   | BLOQ            | BLOQ                  | BLOQ                 | BLOQ                            | BLOQ                | BLOQ               | <b>0.0±0.0</b>         | BLOQ             | BLOQ           | BLOQ              | <b>2.2±0.1</b>            | BLOQ                 | BLOQ                 | BLOQ                     | BLOQ                         | <b>0.0±0.0</b>    | BLOQ            | BLOQ             | BLOQ                   | BLOQ                | 2.2                     |
| Zalt                        | Mango          | 50.0                    | <b>45.3±0.7</b>                                 | <b>-4.7 (9.4%)</b>                  | BLOQ            | BLOQ                  | BLOQ                 | BLOQ                            | BLOQ                | BLOQ               | <b>0.05±0.00</b>       | BLOQ             | BLOQ           | BLOQ              | BLOQ                      | BLOQ                 | BLOQ                 | BLOQ                     | BLOQ                         | <b>0.4±0.05</b>   | BLOQ            | BLOQ             | BLOQ                   | BLOQ                | 0.5                     |
| Zip                         | Mango          | 60.0                    | <b>42.3±1.9</b>                                 | <b>-17.7 (29.5%)</b>                | BLOQ            | BLOQ                  | BLOQ                 | BLOQ                            | BLOQ                | BLOQ               | <b>0.03±0.01</b>       | BLOQ             | BLOQ           | BLOQ              | <b>1.5±0.1</b>            | BLOQ                 | BLOQ                 | BLOQ                     | BLOQ                         | <b>0.3±0.2</b>    | BLOQ            | BLOQ             | BLOQ                   | BLOQ                | 1.8                     |
| Delicious Pods              | Mango          | 50.0                    | <b>40.7±1.1</b>                                 | <b>-9.3 (18.6%)</b>                 | BLOQ            | BLOQ                  | BLOQ                 | BLOQ                            | BLOQ                | BLOQ               | <b>0.05±0.00</b>       | BLOQ             | BLOQ           | BLOQ              | BLOQ                      | BLOQ                 | BLOQ                 | BLOQ                     | BLOQ                         | <b>0.3±0.03</b>   | BLOQ            | BLOQ             | BLOQ                   | BLOQ                | 0.4                     |
| Loxo                        | Mango          | 50.0                    | <b>39.7±0.4</b>                                 | <b>-10.3 (20.6%)</b>                | BLOQ            | BLOQ                  | BLOQ                 | BLOQ                            | BLOQ                | BLOQ               | <b>1.8±0.1</b>         | BLOQ             | BLOQ           | <b>0.1±0.00</b>   | <b>2.4±0.2</b>            | BLOQ                 | BLOQ                 | BLOQ                     | BLOQ                         | <b>0.9±0.1</b>    | BLOQ            | BLOQ             | BLOQ                   | BLOQ                | 5.1                     |
| Sea100                      | Mango          | 50.0                    | <b>39.5±0.9</b>                                 | <b>-10.5 (21.0%)</b>                | BLOQ            | BLOQ                  | BLOQ                 | BLOQ                            | BLOQ                | BLOQ               | <b>0.03±0.00</b>       | BLOQ             | BLOQ           | BLOQ              | <b>1.6±1.3</b>            | BLOQ                 | BLOQ                 | BLOQ                     | BLOQ                         | <b>0.3±0.03</b>   | BLOQ            | BLOQ             | BLOQ                   | BLOQ                | 1.9                     |
| Mingo 1                     | Mango Lemonade | 60.0                    | <b>38.1±1.2</b>                                 | <b>-21.9 (36.5%)</b>                | BLOQ            | BLOQ                  | BLOQ                 | BLOQ                            | BLOQ                | BLOQ               | <b>4.7±0.3</b>         | BLOQ             | BLOQ           | BLOQ              | <b>1.5±0.3</b>            | BLOQ                 | BLOQ                 | BLOQ                     | BLOQ                         | <b>6.6±1.2</b>    | BLOQ            | BLOQ             | BLOQ                   | BLOQ                | 12.9                    |
| Carbon                      | Mango          | 50.0                    | <b>36.6±1.4</b>                                 | <b>-13.4 (26.8%)</b>                | BLOQ            | BLOQ                  | BLOQ                 | BLOQ                            | BLOQ                | BLOQ               | <b>1.6±0.1</b>         | <b>0.1±0.1</b>   | BLOQ           | BLOQ              | BLOQ                      | BLOQ                 | BLOQ                 | BLOQ                     | BLOQ                         | <b>7.0±1.0</b>    | BLOQ            | BLOQ             | BLOQ                   | BLOQ                | 8.6                     |
| Plus Pods                   | Mango          | 60.0                    | <b>35.8±0.8</b>                                 | <b>-24.2 (40.3%)</b>                | BLOQ            | BLOQ                  | BLOQ                 | BLOQ                            | BLOQ                | BLOQ               | <b>0.0±0.0</b>         | BLOQ             | BLOQ           | BLOQ              | <b>2.8±0.3</b>            | BLOQ                 | BLOQ                 | BLOQ                     | BLOQ                         | <b>0.0±0.0</b>    | BLOQ            | BLOQ             | BLOQ                   | BLOQ                | 2.8                     |
| Fuma                        | Pure Mango     | 60.0                    | <b>35.2±1.1</b>                                 | <b>-24.8 (41.3%)</b>                | BLOQ            | BLOQ                  | BLOQ                 | BLOQ                            | BLOQ                | BLOQ               | <b>0.6±0.1</b>         | BLOQ             | BLOQ           | BLOQ              | BLOQ                      | <b>0.8±0.00</b>      | BLOQ                 | BLOQ                     | BLOQ                         | <b>3.7±0.9</b>    | BLOQ            | BLOQ             | BLOQ                   | BLOQ                | 5.2                     |
| EonSmoke                    | Mango          | 60.0                    | <b>31.9±0.6</b>                                 | <b>-28.1 (46.8%)</b>                | BLOQ            | BLOQ                  | BLOQ                 | BLOQ                            | BLOQ                | BLOQ               | <b>0.0±0.0</b>         | BLOQ             | BLOQ           | BLOQ              | <b>3.0±0.4</b>            | BLOQ                 | BLOQ                 | BLOQ                     | BLOQ                         | <b>0.0±0.0</b>    | BLOQ            | BLOQ             | BLOQ                   | BLOQ                | 3.0                     |
| Mingo 2                     | Mango          | 60.0                    | <b>28.5±1.0</b>                                 | <b>-31.5 (52.5%)</b>                | BLOQ            | BLOQ                  | BLOQ                 | BLOQ                            | BLOQ                | BLOQ               | <b>1.0±0.05</b>        | BLOQ             | BLOQ           | BLOQ              | <b>0.7±0.00</b>           | BLOQ                 | BLOQ                 | BLOQ                     | BLOQ                         | <b>6.4±0.7</b>    | BLOQ            | BLOQ             | BLOQ                   | BLOQ                | 8.2                     |
| Non-Juul Average±STDEV      |                | 55.1±5.3                | <b>42.8±8.9</b>                                 | <b>-12.3 (22.3%)</b>                | n/a             | n/a                   | n/a                  | n/a                             | n/a                 | n/a                | <b>0.8±1.3</b>         | <b>0.1±0.0</b>   | n/a            | <b>0.4±0.4</b>    | n/a                       | <b>1.8±0.7</b>       | n/a                  | n/a                      | <b>2.6±2.7</b>               | n/a               | n/a             | n/a              | n/a                    | n/a                 | 4.2±3.5                 |
| Limit of Quantitation (LOQ) |                | --                      | 0.1                                             | --                                  | 0.3             | 0.6                   | 0.0                  | 0.0                             | 0.1                 | 0.1                | 0.02                   | 0.02             | 0.6            | 0.1               | 0.1                       | 0.6                  | 0.1                  | 0.02                     | 0.2                          | 0.1               | 0.04            | 0.6              | 0.3                    | 0.3                 | n/a                     |

Supplemental Table 1. Nicotine and flavoring concentrations detected in mango original Juul and Juul-compatible PODs. Bold values are significantly different from Juul using Dunn's multiple comparisons ( $p < 0.05$ ).
