# Supplementary material for: Removal of mango-flavoured Juul pods created opportunity for adulterated mango Juul-compatible pods with altered chemical constituents
Source: PubMed Central journal article supplement — Tob Control. 2022 Oct 28;31(Suppl 3):s230–3. doi: 10.1136/tc-2022-057476 (PMC9664127; doi:10.1136/tc-2022-057476), 2022-10-28
Supplement: tc-2022-057476supp002.pdf [file tc-2022-057476supp002.pdf]

**Supplemental Table 2.** Chemicals found in mango original Juul and Juul-compatible PODs in this study. **Note:** <sup>a</sup> Includes only compounds found in more than one product. <sup>b</sup> Indicates flavorings also quantitated, Supplemental Table 1
